# Supplementary material for: Adsorption characteristics of graphene oxide nanosheets on cement
Source: Royal Society of Chemistry journal article supplement (doi:10.1039/c6ra10902k), 2016-01-01
Supplement: c6ra10902k1.pdf [file c6ra10902k1.pdf]

## Supplementary Information

### Adsorption characteristics of graphene oxide nanosheets on cement

Min Wang, Rumin Wang, Hao Yao, Zhujun Wang, Shuirong Zheng

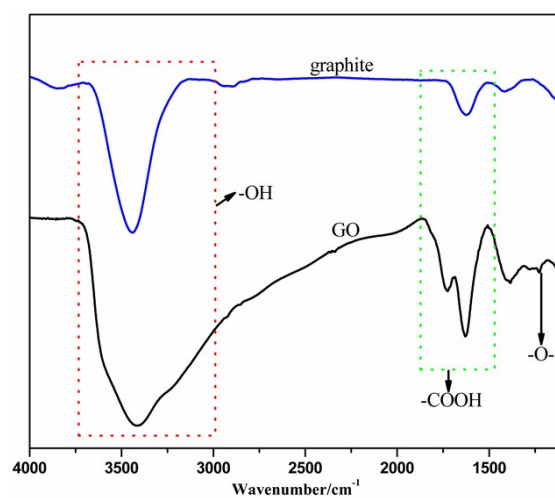

**Fig. S1** The FTIR spectra of graphite and GO.

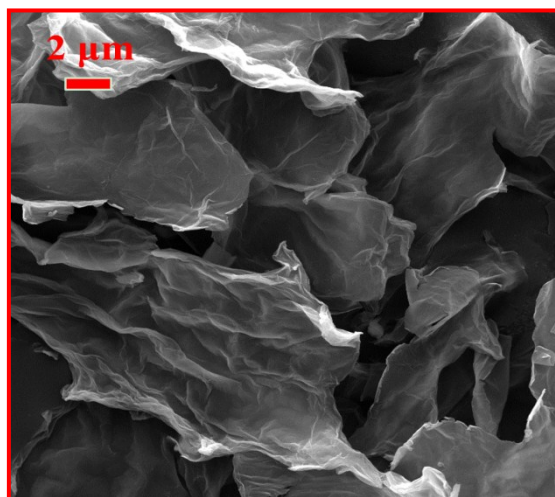

**Fig. S2** The microstructure of GO.

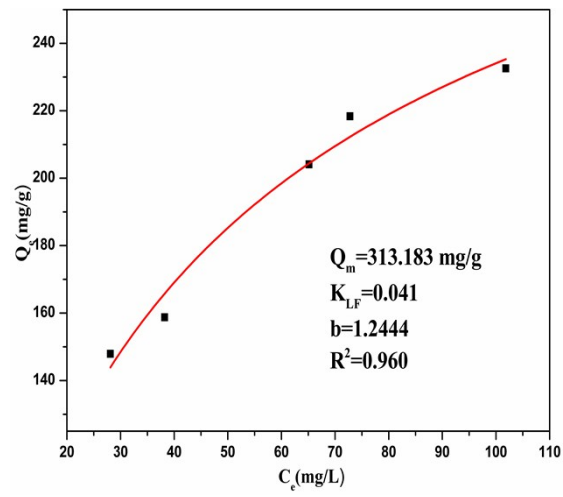

**Fig. S3** The Langmuir- Freundlich isotherm model for the adsorption of the GO nanosheets on cement.
